# Supplementary material for: Modified cellulose-based separator with high transference number and uniform lithium deposition for dendrite-free lithium metal batteries
Source: Royal Society of Chemistry journal article supplement (doi:10.1039/d5ra07003a), 2025-01-01
Supplement: d5ra07003a1.pdf [file d5ra07003a1.pdf]

# Modified cellulose-based separator with high transference number and uniform lithium deposition for dendrite-free lithium metal batteries

Chao Gao<sup>a#</sup>, Lianghong Wu<sup>b#</sup>, Yulin Lu<sup>a</sup>, Hang Sun<sup>a</sup>, Yun Li<sup>a</sup>, Weiwei Liu<sup>a</sup>, Jinlan Luo<sup>c\*</sup>, Changyong Song<sup>d\*</sup>

- a. Shandong Open University, Jinan, China, 250014
- b. Jinan Thermoelectric Engineering Co., Ltd. Jinan, China, 250022.
- c. Center for Advanced Low-dimension Materials State Key Laboratory for Modification of Chemical Fibers and Polymer Materials College of Chemistry and Chemical Engineering Donghua University Shanghai, China, 201600
- d. State Key Laboratory of Heavy Oil Processing, School of Materials Science and Engineering, China University of Petroleum (East China), Qingdao, China, 266580

# Chao Gao and Lianghong Wu contributed equally to this work

\* Changyong Song and Jinlan Luo are Corresponding authors.

## Figures

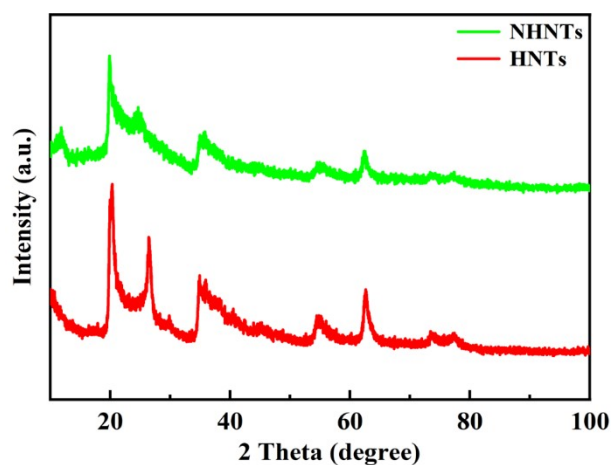

Fig.S1 XRD spectra of HNTs and NHNTs.

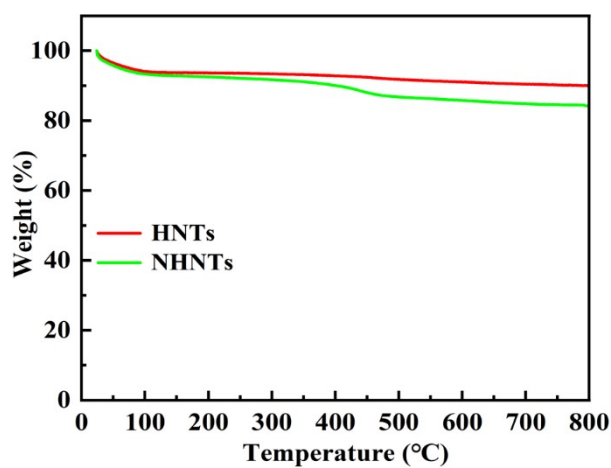

Fig.S2 TGA spectra of HNTs and NHNTs.

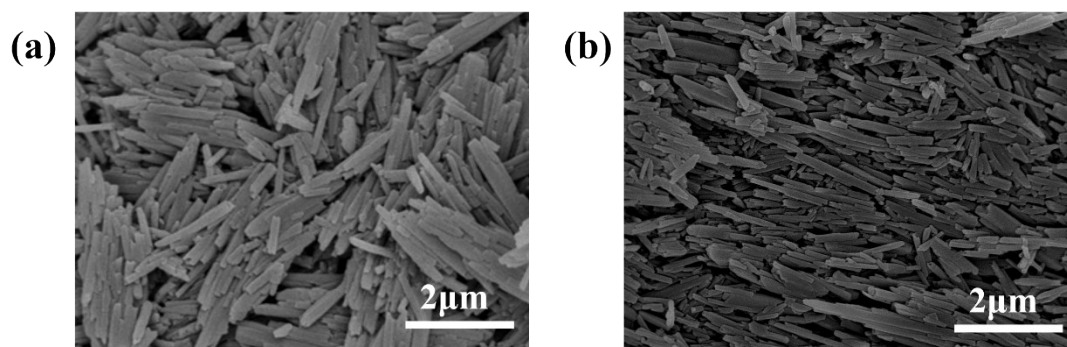

Fig.S3 SEM spectra of (a) HNTs and (b) NHNTs.

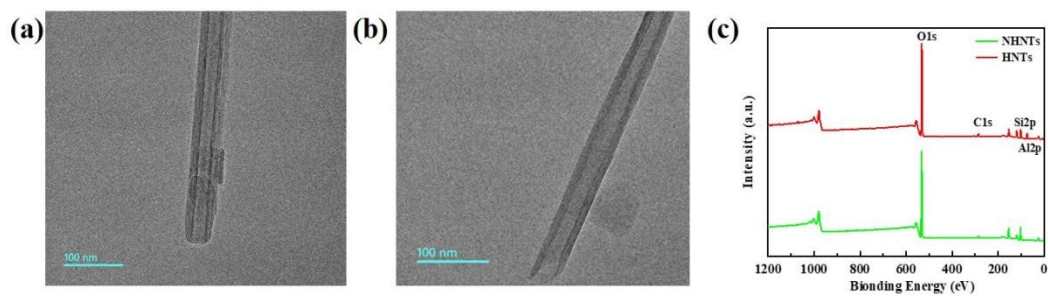

**Fig.S4 TEM spectra of (a) HNTs , (b) NHNTs , and  
XRS spectra of HNTs and NHNTs (c).**

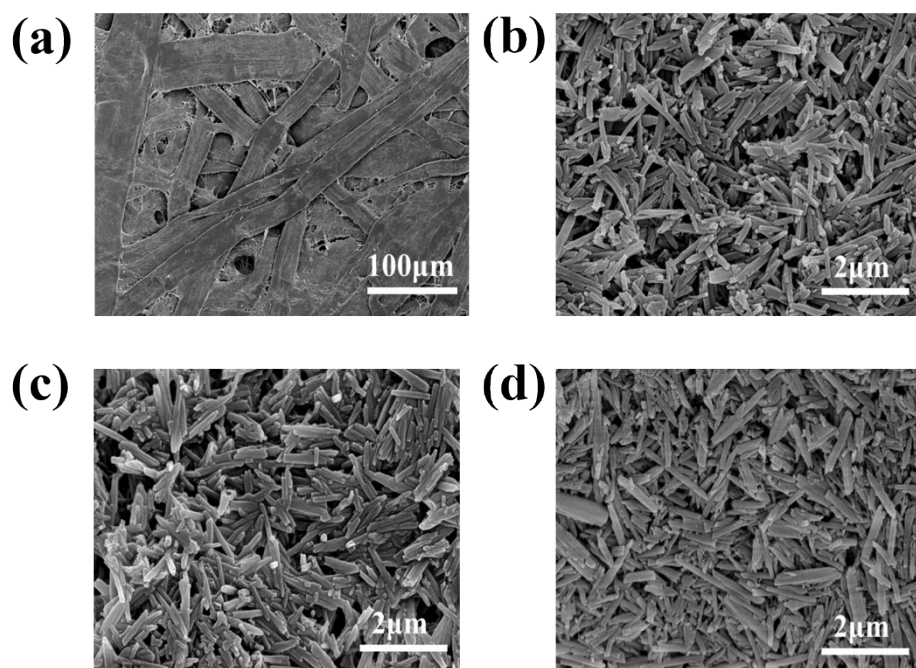

**Fig.S5 SEM images of (a) CP, (b) NHNTs1:1, (c) NHNTs1:2, and NHNTs2:1.**

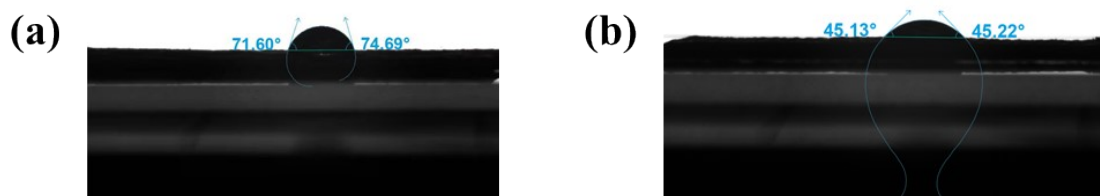

**Fig.S6 Contact angle of (a) unacidified HNT , and (b) NHNTs 2:1**

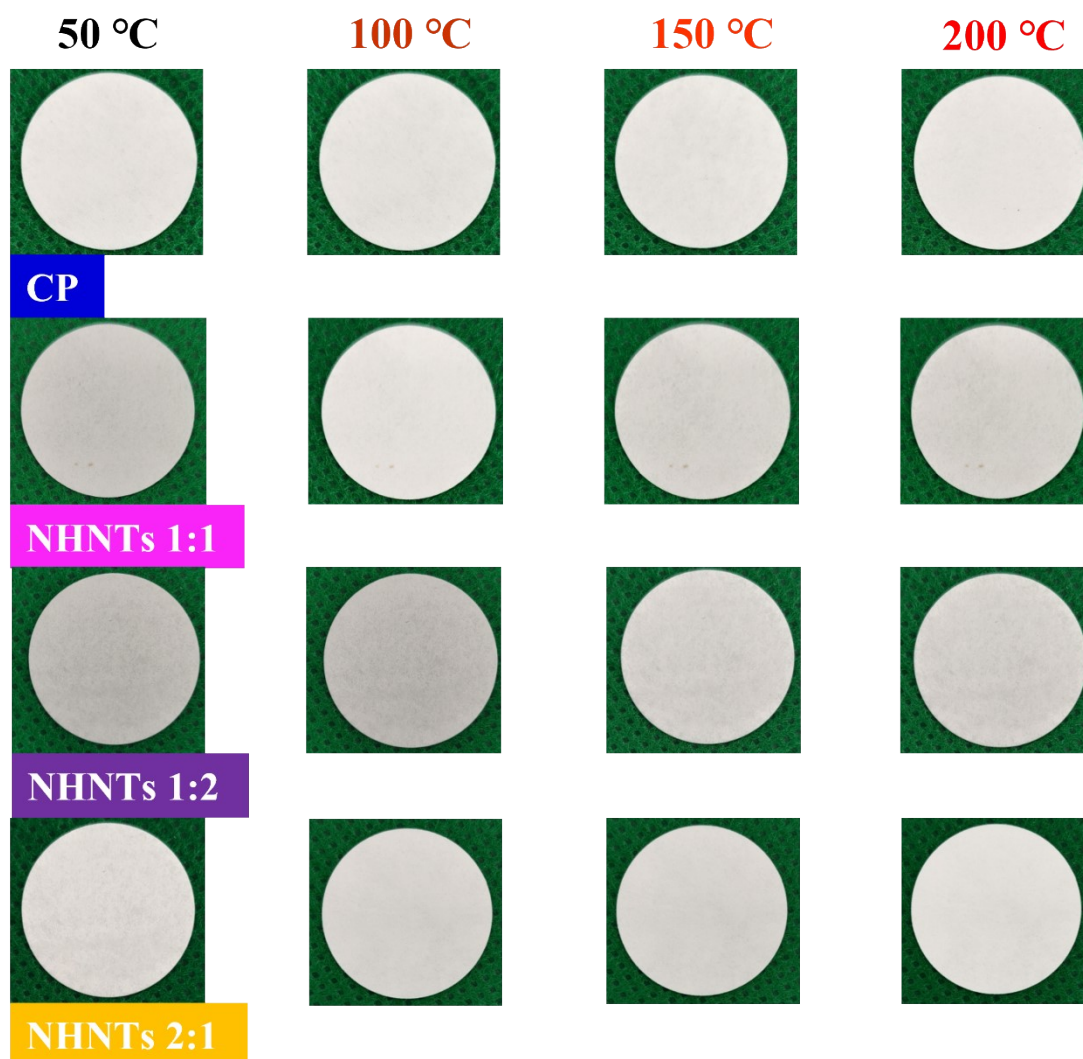

**Fig.S7 Thermal dimensional stability of CP, NHNTs1:1, NHNTs1:2, and NHNTs2:1.**

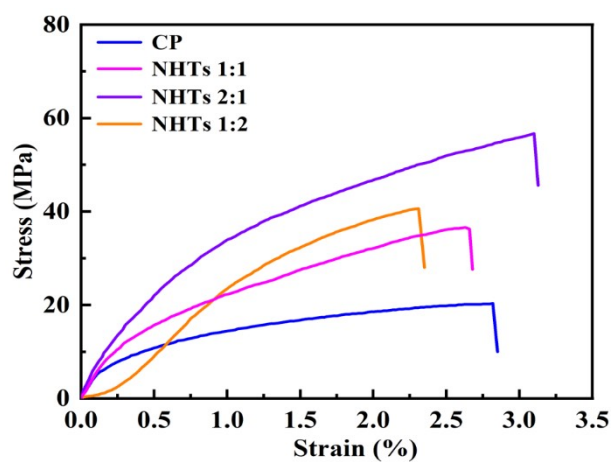

**Fig.S8 Stress-strain curves of CP separator, NHNTs1:1 separator, NHNTs1:2 separator, and NHNTs2:1 separator.**

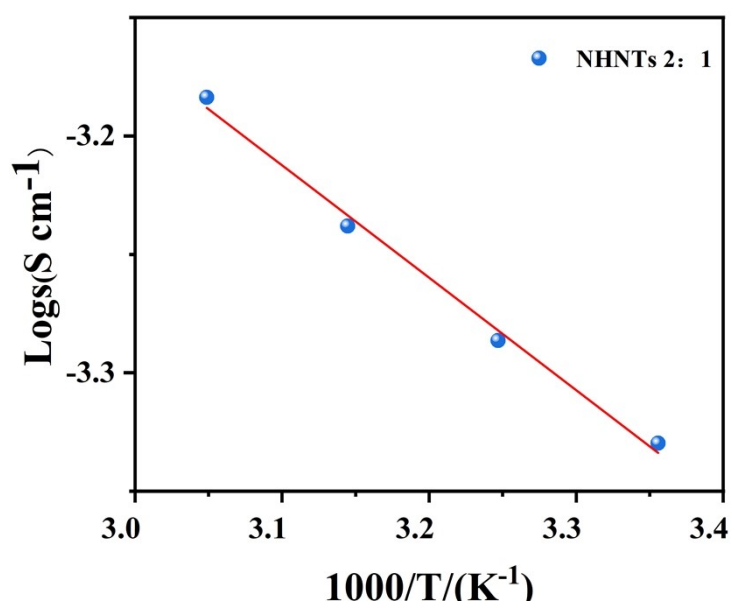

Fig.S9 Arrhenius plots of NHNTs 2:1 separator

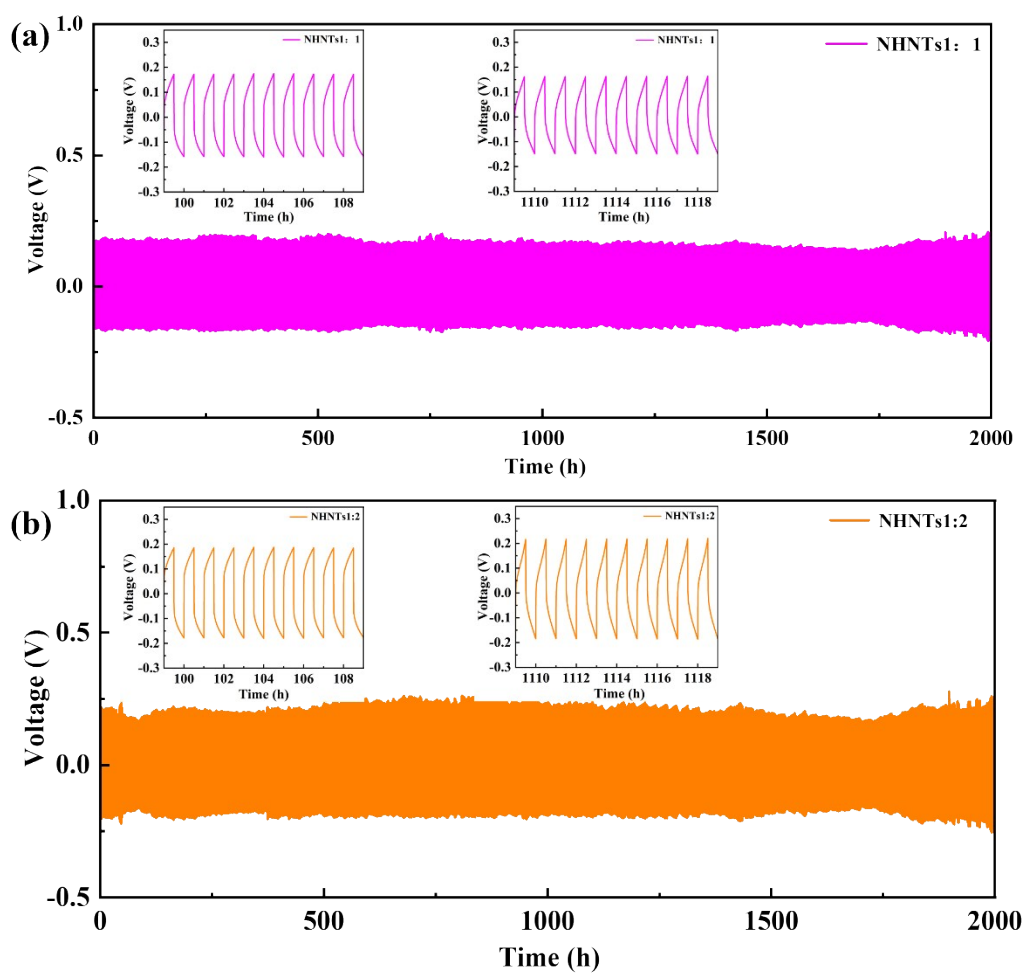

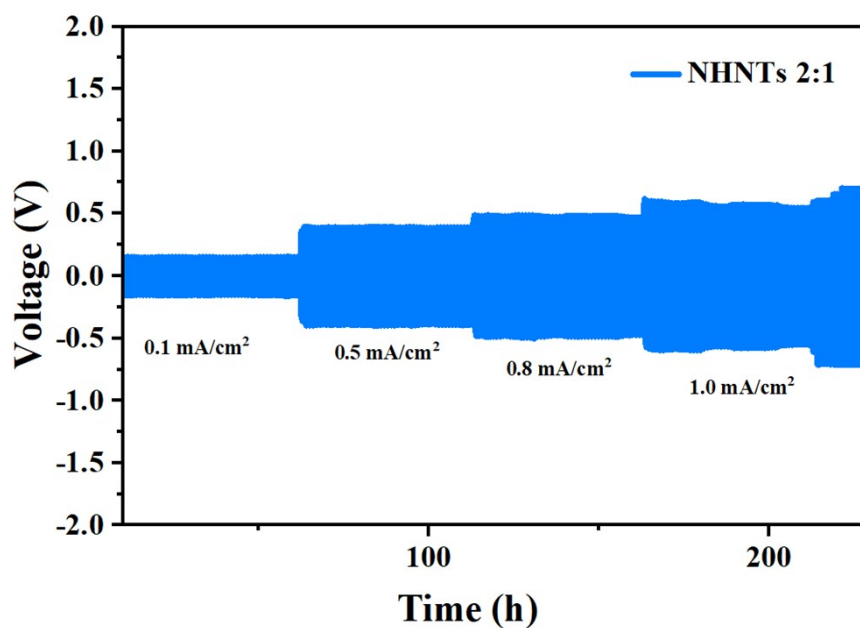

**Fig.S10** Voltage versus time plots symmetric cell under a current density of  $0.1 \text{ mA cm}^{-2}$  of (a) NHNTs1:1, (b) NHNTs1:2, and (c) Voltage profiles of Li plating/stripping cycling with NHNTs 2:1 separator at different currents

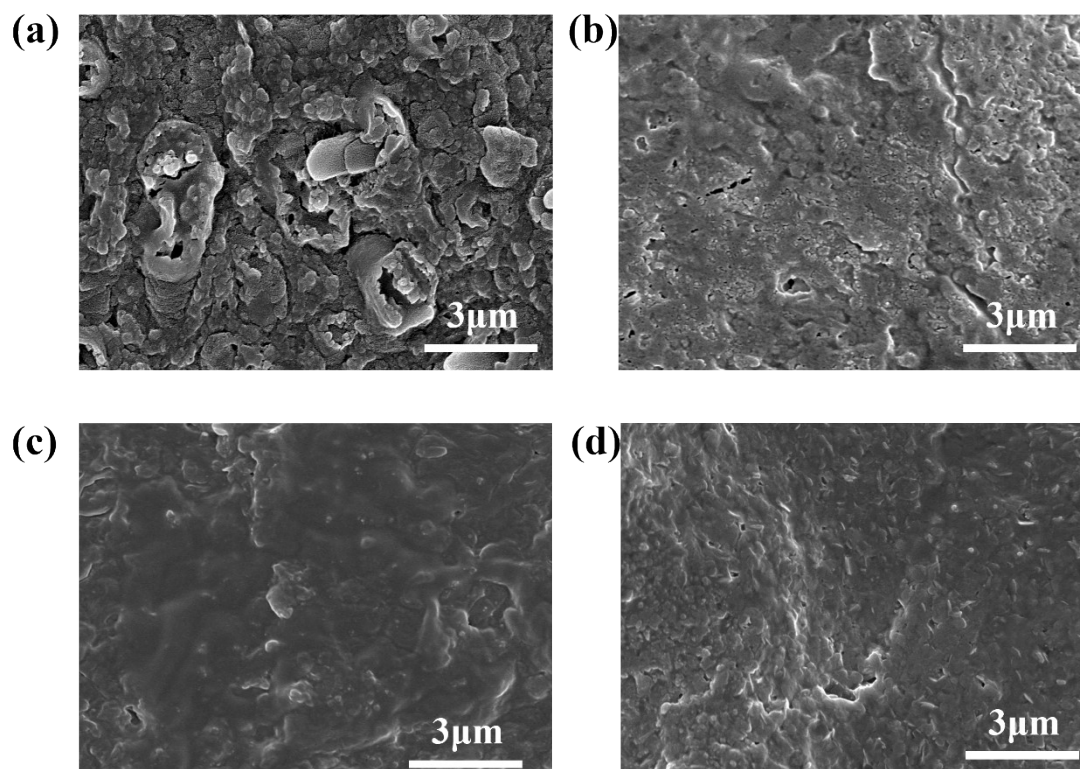

**Fig.S11** SEM images of Li surface employing (a) CP separator, (b) NHNTs1:1 separator, (c) NHNTs2:1 separator, and (d) NHNTs1:2 separator after 2000 h.

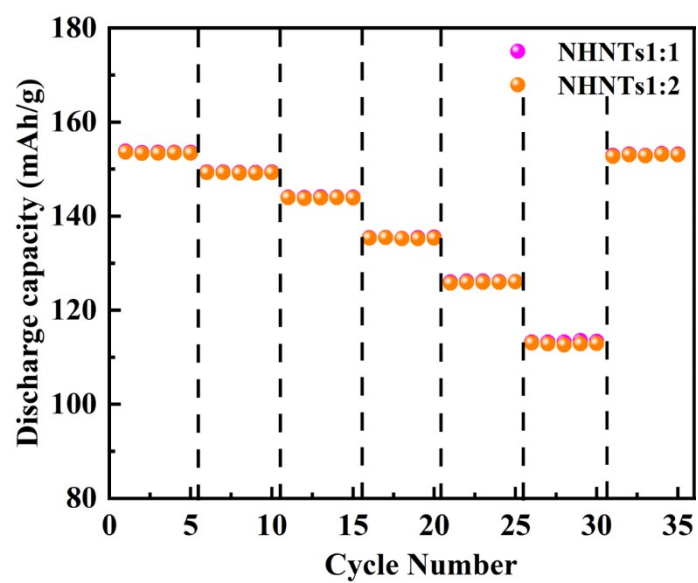

Fig.S12 C-rate capability.

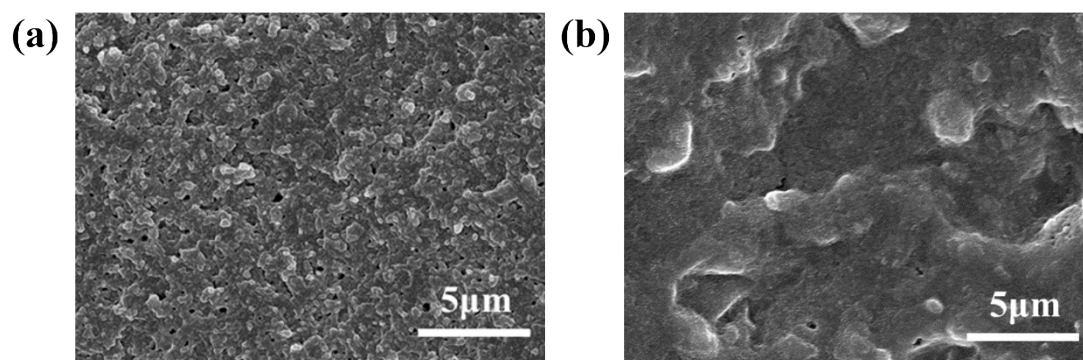

Fig.S13 SEM images of Li surface employing (a) CP separator, (b) NHNTs2:1 separator after 500 cycles.
